## Correction

**Correction: A pentacyclic triterpene natural product, ursolic acid and its prodrug US597 inhibit targets within cell adhesion pathway and prevent cancer metastasis****Liping Xiang<sup>1</sup>, Ting Chi<sup>1</sup>, Qiao Tang<sup>1</sup>, Xiang Yang<sup>1</sup>, Minrui Ou<sup>1</sup>, Xiufen Chen<sup>1</sup>, Xiaobo Yu<sup>1</sup>, Jianzhong Chen<sup>2</sup>, Rodney J.Y. Ho<sup>3</sup>, Jingwei Shao<sup>1</sup>, Lee Jia<sup>1</sup>**<sup>1</sup>Cancer Metastasis Alert and Prevention Center, and Pharmaceutical Photocatalysis of State Key Laboratory of Photocatalysis on Energy and Environment, College of Chemistry, Fuzhou University, Fuzhou 350002, China<sup>2</sup>School of Pharmacy, Fujian University of Traditional Chinese Medicine, Fuzhou, Fujian 350108, China<sup>3</sup>Department of Pharmaceutics, University of Washington, Seattle, WA 98105, USA**Published:****Copyright:** Xiang et al. This is an open-access article distributed under the terms of the Creative Commons Attribution License 3.0 (CC BY 3.0), which permits unrestricted use, distribution, and reproduction in any medium, provided the original author and source are credited.**This article has been corrected:** Due to mistakes made during figure assembly, Figures 2 and 6 contain minor errors. The proper figures are shown below. The authors declare that these corrections do not change the results or conclusions of this paper.Original article: Oncotarget. 2015; 6:9295–9312. <https://doi.org/10.18632/oncotarget.3261>

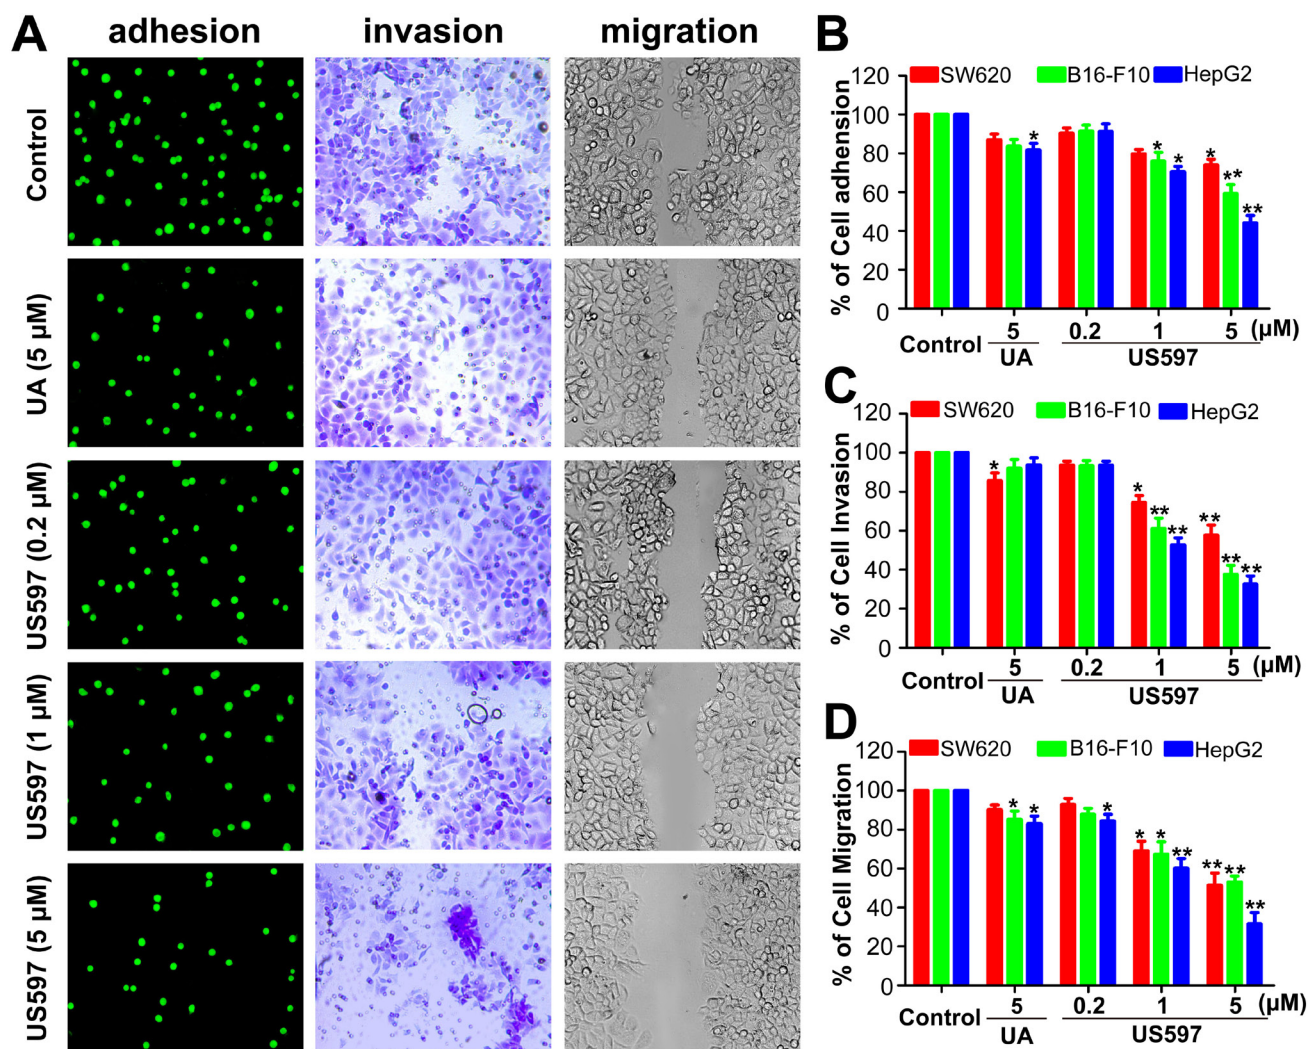

**Figure 2:** (A) The number of adherent HepG2 cells was photographed under the fluorescence microscope at  $\times 200$  magnification (left); b, phase micrograph of invading HepG2 cells were treated with UA or US597 (middle); c, phase micrographs of HepG2 cells were treated with UA or US597 at 24 h after monolayer wounding (right). (B) Quantitative analysis of the inhibition by UA/US597 on the adhesion of SW620, B16-F10 and HepG2 to HUVECs. (C) Cells invaded through the membrane were quantified. (D) Migrated cells were quantified by manual counting. Data are obtained from 3 separate experiments and bars represent the mean  $\pm$  SD. \* indicates  $P < 0.05$  and \*\* means  $P < 0.01$ .

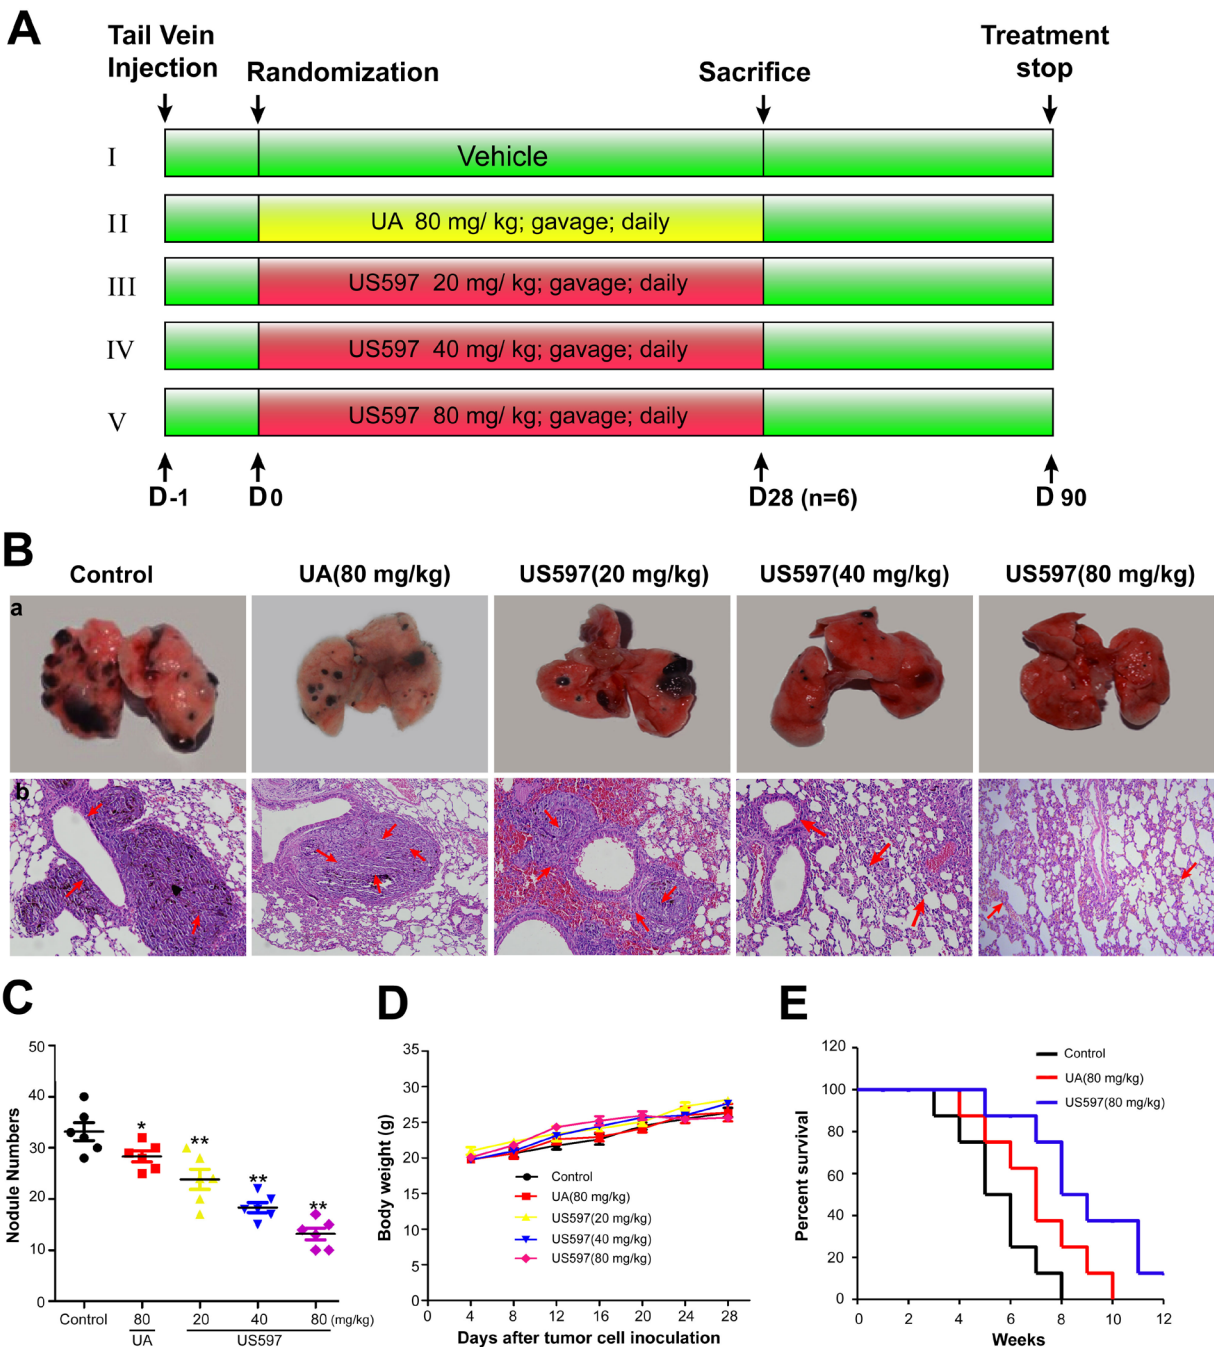

**Figure 6:** (A) Schematic representation of the experimental protocol described in materials and methods ( $n = 14$ ). (B) a, Photography of the lung of animals inoculated with B16-F10 melanoma via tail vein; b, hematoxylin–eosin staining assay represent the metastases in the lungs, the arrows indicate the metastatic area in each group, amplification  $\times 100$ . (C) Metastatic tumor nodules number in lung metastasis model. (D) Body weight change during treatment periods. (E) Kaplan–Meier survival analysis showed cumulative postinoculation survival rates of the 80 mg/kg UA/US597 treated mice comparison with the saline treated group. The results were expressed as mean  $\pm$  SD.  $*P < 0.05$ ,  $**P < 0.01$  vs control.
